# Supplementary material
Source: Copernicus journal article supplement (doi:10.5194/egqsj-7-5-1956)
Supplement: Supplementary file 1 [file egqsj-7-5-1956-supplement.pdf]

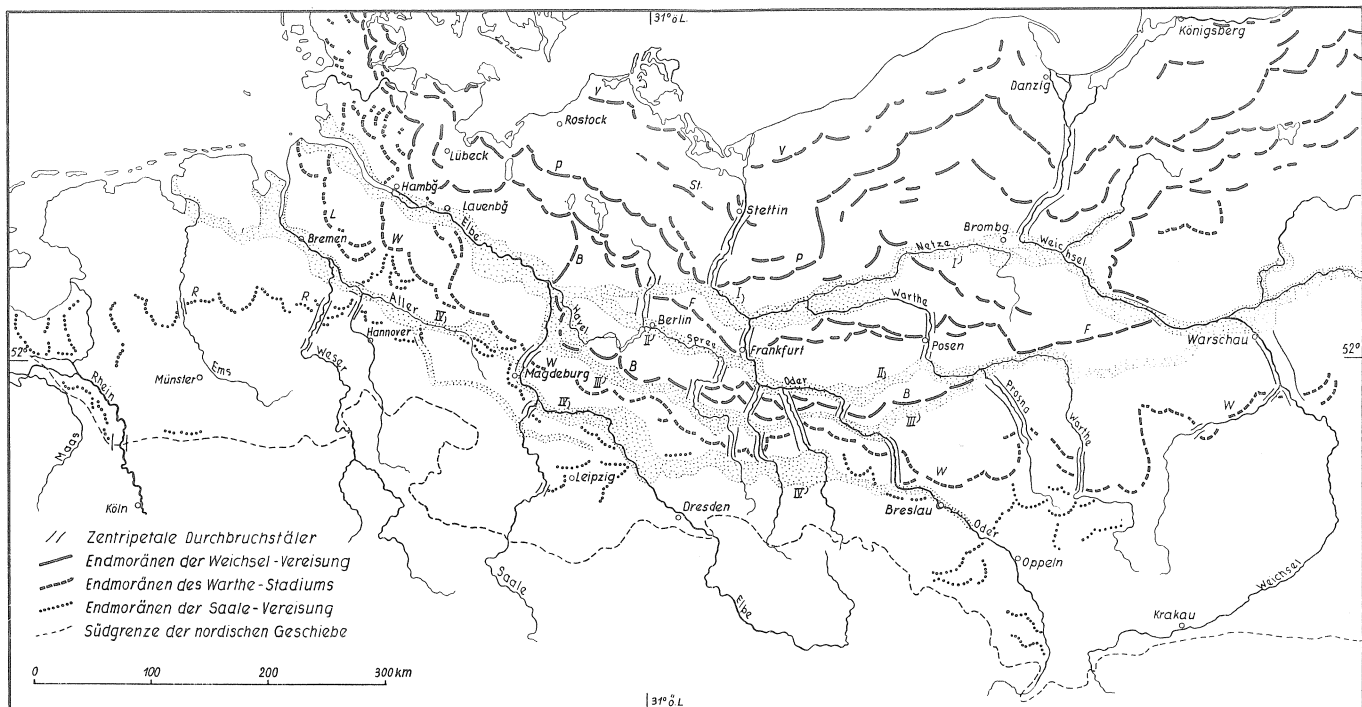

Endmoränen, Urstromtäler und zentripetale Durchbruchstäler in Norddeutschland und angrenzenden Gebieten.

V = Velgaster, P = Pommersches, F = Frankfurter, B = Brandenburger, W = Warthe- L = Lamstedter Stadium.

I = Thorn-Eberswalder, II = Warschau-Berliner, III = Glogau-Baruther, IV = Breslau-Magdeburg-Bremer Urstromtal.
